# Supplementary material
Source: HighWire-hosted journal article supplement (https://bibliotheek.ehb.be:2672/highwire/filestream/206416/field_highwire_adjunct_files/0/thorax-2022-219668supp001_data_supplement.pdf)
Supplement: thorax-2022-219668supp001_data_supplement.pdf [file thorax-2022-219668supp001_data_supplement.pdf]

1

**ONLINE SUPPLEMENT**

2    **TRPC6 inhibitor (BI 764198) to reduce risk and severity of ARDS due to COVID-19: a Phase**  
3    **II randomised controlled trial**

4    Lorraine B. Ware, Nima Soleymanlou, Danny F. McAuley, Vicente Estrada, George A. Diaz,

5    Peter LaCamera, Renee Kaste, Wansuk Choi, Abhya Gupta, Tobias Welte

## 6 **Supplementary Methods**

### 7 **Exclusion criteria**

8 The exclusion criteria included: pulmonary oedema/respiratory failure due to cardiogenic  
9 insult; long-term oxygen therapy prior to current hospitalization; a history of cardiac  
10 conditions (myocardial infarction <3 months prior to first dose, unstable angina, and/or a  
11 prolonged QTc interval [as observed on an electrocardiogram or a family history of this]);  
12 received experimental, or off-label usage of, medicinal products as specific treatments for  
13 COVID-19; or any confounding condition.

### 14 **Screening and dosage**

15 Patients who are already hospitalised for COVID-19 were identified and screened. For  
16 patients who met the inclusion criteria, a confirmatory SARS-CoV-2 test (confirmed by  
17 polymerase chain reaction or an approved point-of-care test) was performed during the  
18 screening period (Day -3 to Day 1), after which study medication was administered on Day  
19 1. Efforts were made to minimise the time between patient identification, screening and  
20 treatment initiation. Patients received daily BI 764198 or placebo in the form of an oral  
21 capsule or, only if needed, via nasogastric intubation, following overnight fasting and 1.5  
22 hours prior to breakfast. Dose reductions or down-titrations were not permitted; however,  
23 trial treatment could be restarted following a temporary reason for treatment  
24 discontinuation. Drug administration was in-hospital and overseen by the clinical staff. For  
25 each dose of BI 764198 or placebo administered, the date, time and route (orally or via  
26 nasogastric intubation) was recorded in the electronic care report forms (eCRFs). Any  
27 missed doses were also recorded in the eCRFs.

## 28    **Clinical, physiology and adverse events monitoring**

29    Assessments of concomitant therapy and procedures, hospitalization status, WHO Clinical  
30    Progression Scale, ventilation and oxygen parameters (respiratory rate, fraction of inspired  
31    oxygen [FiO<sub>2</sub>], oxygen saturation [SpO<sub>2</sub>]) and blood gases/partial pressure of oxygen (PaO<sub>2</sub>)  
32    (if captured as part of routine care) were carried out daily until hospital discharge (up to Day  
33    28). All except blood gases/PaO<sub>2</sub> were also carried out during follow-up. Adverse events  
34    (AEs) were recorded daily and by telephone call following discharge from hospital 4 days  
35    after the end of treatment and on Days 15, 29, 60 and 90 (counted from Day 1 of the trial).  
36    Vital status was recorded at each follow-up visit. Follow-up visits were conducted by  
37    telephone calls. For patients that remained hospitalised after the end of the treatment  
38    period, follow-up visits were conducted in hospital until discharge and thereafter by  
39    telephone call. Trial completion was defined as the completion of all follow-up visits.

## 40    **Statistical analysis**

41    The proportions of patients alive and free of mechanical ventilation at Day 29 (primary  
42    endpoint) was analysed using a logistic regression model with covariates of treatment,  
43    severity grade at baseline, age, creatinine at baseline and duration of symptoms before  
44    hospitalization. The logistic regression for the primary endpoint analysis was used for all  
45    other binary endpoints, whereas time-to-event endpoints were analysed using a Cox  
46    regression, which included the same covariates used for the primary endpoint analysis. The  
47    difference in ventilator-free days between BI 764198 and placebo groups was analysed  
48    using ANCOVA model including the same covariates as in the primary endpoint analysis.  
49    Efficacy analyses were performed according to a prespecified analysis plan in all randomized  
50    patients documented to have received at least one dose of trial medication (full analysis

51 set). The intent-to-treat principle was applied to the randomized set, including all observed  
52 data in the primary analysis regardless of treatment discontinuation.

### 53 **Sensitivity and subgroup analyses**

54 A sensitivity analysis was conducted with a logistic regression model including covariates of  
55 treatment, severity grade at baseline, age, creatinine at baseline, D-dimer at baseline, and  
56 duration of symptoms before hospitalisation. Subgroup analysis was performed using  
57 descriptive statistics.

### 58 **Determination of sample size**

59 The proportion of patients assumed to be alive and free of mechanical ventilation at Day 29  
60 in the placebo group is expected to be ~81%. It is assumed that BI 764198 would increase  
61 this proportion by 9% (from 81% to 90%). The probability of observing  $\geq 5\%$  improvement in  
62 the primary endpoint ( $\geq 86\%$  in BI 764198 group as opposed to 81% in placebo group) is 72%  
63 under this assumption with a total of 130 patients (65 patients per group). If there is no  
64 treatment effect (81% in both BI 764198 and placebo group), the probability of observing  
65  $\geq 5\%$  improvement is 22% as depicted in Table E2. As the treatment policy is used to analyse  
66 the primary endpoint, early discontinuation is not considered in the sample size calculation.

**Table 1. Trial site locations**

| Country                 | Sites                                                                                                                                                                                                                                                                                                                                                                                                                                                                                                                                                                                                                                                                                                                                                                                                                                                                                                                                              |
|-------------------------|----------------------------------------------------------------------------------------------------------------------------------------------------------------------------------------------------------------------------------------------------------------------------------------------------------------------------------------------------------------------------------------------------------------------------------------------------------------------------------------------------------------------------------------------------------------------------------------------------------------------------------------------------------------------------------------------------------------------------------------------------------------------------------------------------------------------------------------------------------------------------------------------------------------------------------------------------|
| United States<br>(n=61) | <p>Dr. Richard A Lee, University of California Irvine, Orange, California, United States, 92868</p> <p>Dr. Naseem A Jaffrani, Rapides Regional Medical Center, Alexandria, Louisiana, United States, 71301</p> <p>Dr. Peter LaCamera, St. Elizabeth's Medical Center, Boston, Massachusetts, United States, 02135</p> <p>Dr. Harry M Schrager, Newton-Wellesley Hospital, Newton, Massachusetts, United States, 02462</p> <p>Dr. Salil Avasthi, Mercy Health St. Vincent Medical Center, Toledo, Ohio, United States, 43608</p> <p>Dr. George A Diaz, Providence Regional Medical Center, Everett, Washington, United States, 98201</p> <p>Dr. Patrick S Meehan, MultiCare Tacoma General Hospital, Tacoma, Washington, United States, 98405</p> <p>Dr. Alvaro U Aranda-Rodriguez, Hospital Auxilio Mutuo, Hato Rey, Puerto Rico, 00919</p> <p>Dr. Ricardo Fernandez-Gonzalez, Hospital Municipal de San Juan, Rio Piedras, Puerto Rico, 00936</p> |

| Country              | Sites                                                                                                                                                                                                                                                                                                                                                                                                                                                                                                                      |
|----------------------|----------------------------------------------------------------------------------------------------------------------------------------------------------------------------------------------------------------------------------------------------------------------------------------------------------------------------------------------------------------------------------------------------------------------------------------------------------------------------------------------------------------------------|
| Spain<br><br>(n=37)  | <p>Dr. Enrique Míguez, Hospital A Coruña, A Coruña, Spain, 15006</p> <p>Dr. Sergio Reus, Hospital General Universitario de Alicante, Alicante, Spain, 03010</p> <p>Dr. Jesús Troya García, Hospital Universitario Infanta Leonor, Madrid, Spain, 28031</p> <p>Dr. Vicente Estrada, Hospital Clínico San Carlos, Madrid, Spain, 28040</p> <p>Dr. Cristina de la Calle, Hospital Universitario 12 de Octubre, Madrid, Spain, 28041</p> <p>Dr. Melchor Riera Jaume, Hospital Son Espases, Palma de Mallorca, Spain, 07120</p> |
| Brazil<br><br>(n=16) | <p>Dr. Frederico B Carvalho, Hospital Luxemburgo, Belo Horizonte, Brazil, 32380-490</p> <p>Dr. José Francisco K Saraiva, IPECC - Instituto de Pesquisa Clínica de Campinas, Campinas, Brazil, 13060-080</p> <p>Juliana C Fernandes, M.D., Hospital Ernesto Dornelles, Porto Alegre, Brazil, 90160-092</p> <p>Dr. Conrado R Hoffman Filho, Hospital Regional Hans Dieter Schmidt, Santa Catarina, Brazil, 89227</p>                                                                                                         |

| Country          | Sites                                                                                                                                                                                                                                                                                                                                |
|------------------|--------------------------------------------------------------------------------------------------------------------------------------------------------------------------------------------------------------------------------------------------------------------------------------------------------------------------------------|
|                  | Suzana Lobo, M.D., Hospital de Base - Fac Med de Sao Jose do Rio Preto, Sao Jose do Rio Preto, Brazil, 15090-000                                                                                                                                                                                                                     |
| Mexico<br>(n=11) | Dr. Francisco Marquez Díaz, Hospital Cardiologica Aguascalientes, Aguascalientes, Mexico, 20230<br><br>Dr. Jorge A Zamudio Lerma, Hospital General de Culiacán "Dr. Bernardo J. Gastellum", Culiacán, Mexico, 80230<br><br>Dr. Luis Adrian Rendon Perez, Hospital Universitario Dr Jose Eleuterio Gonzalez, Monterrey, Mexico, 64460 |
| Chile<br>(n=4)   | María Schnettler, M.D., Hospital Padre Alberto Hurtado, Santiago, Chile, 8880465<br><br>Claudia M Cartagena Salinas, M.D., Hospital Carlos Van Buren, Valparaíso, Chile, 2341131                                                                                                                                                     |

Table 2. Probabilities of observing an improvement of 5% under different scenarios

| Assumed true value            | <5% | ≥5% |
|-------------------------------|-----|-----|
| Negative scenario: Delta = 0% | 78% | 22% |
| Positive scenario: Delta = 9% | 28% | 72% |



Table 3. Duration of oxygen use days by Day 29

|                                  | BI 764198<br><br>n=65 | Placebo<br><br>n=63 |
|----------------------------------|-----------------------|---------------------|
| Duration of oxygen use by Day 29 |                       |                     |
| Days, mean (SD)                  | 12.6 (10.8)           | 9.4 (10.1)          |
| 95% CI                           | 12.3–17.1             | 8.8–13.7            |

Patients were analysed using ANCOVA with fixed effects of treatment, severity grade at baseline, age, creatinine at baseline and duration of symptoms before hospitalization as covariates.

CI, confidence interval; SD, standard deviation.

Table 4. Patient characteristics, duration of treatment and time to death for patients who died

| Country | Age | Sex  | Race                      | Score on WHO clinical scale at baseline | Clinical frailty scale | Treatment arm | Time on treatment, days | Time to death after start of treatment, days | AEs (preferred term)                               |
|---------|-----|------|---------------------------|-----------------------------------------|------------------------|---------------|-------------------------|----------------------------------------------|----------------------------------------------------|
| BR      | 76  | Male | Black or African American | 5                                       | 6- Moderately frail    | BI 764198     | 1                       | 12                                           | Distributive shock, pneumonia, respiratory failure |
| CL      | 77  | Male | White                     | 5                                       | 6- Moderately frail    | BI 764198     | 4*                      | 26                                           | Aspergillus infection                              |

| Country | Age | Sex  | Race                              | Score on WHO clinical scale at baseline | Clinical frailty scale | Treatment arm | Time on treatment, days | Time to death after start of treatment, days | AEs (preferred term)                                                              |
|---------|-----|------|-----------------------------------|-----------------------------------------|------------------------|---------------|-------------------------|----------------------------------------------|-----------------------------------------------------------------------------------|
| ES      | 75  | Male | White                             | 5                                       | 3-Managing well        | BI 764198     | 8                       | 10                                           | Septic shock                                                                      |
| MX      | 75  | Male | American Indian or Alaskan Native | 6                                       | 3-Managing well        | BI 764198     | 18                      | 19                                           | Acute respiratory distress syndrome, pneumomediastinum, pneumothorax, haemothorax |

| Country | Age | Sex  | Race                              | Score on WHO clinical scale at baseline | Clinical frailty scale | Treatment arm | Time on treatment, days | Time to death after start of treatment, days | AEs (preferred term)                     |
|---------|-----|------|-----------------------------------|-----------------------------------------|------------------------|---------------|-------------------------|----------------------------------------------|------------------------------------------|
| MX      | 63  | Male | American Indian or Alaskan Native | 5                                       | 2-Well                 | BI 764198     | 13                      | 14                                           | Diarrhoea, COVID-19                      |
| USA     | 85  | Male | Black or African American         | 6                                       | 6-Moderately frail     | BI 764198     | 7                       | 7                                            | Respiratory failure, acute kidney injury |
| USA     | 75  | Male | White                             | 5                                       | 3-Managing well        | BI 764198     | 6                       | 59                                           | Death (cause unknown,                    |

| Country | Age | Sex  | Race  | Score on WHO clinical scale at baseline | Clinical frailty scale | Treatment arm | Time on treatment, days | Time to death after start of treatment, days | AEs (preferred term)                                   |
|---------|-----|------|-------|-----------------------------------------|------------------------|---------------|-------------------------|----------------------------------------------|--------------------------------------------------------|
|         |     |      |       |                                         |                        |               |                         |                                              | found at home in bed)                                  |
| USA     | 68  | Male | White | 6                                       | 3-Managing well        | BI 764198     | 16                      | 20                                           | Respiratory failure, liver injury, acute kidney injury |
| USA     | 62  | Male | White | 6                                       | 1-Very fit             | BI 764198     | 8*                      | 37                                           | COVID-19 pneumonia, cardiac tamponade,                 |

| Country | Age | Sex | Race | Score on WHO clinical scale at baseline | Clinical frailty scale | Treatment arm | Time on treatment, days | Time to death after start of treatment, days | AEs (preferred term)                                                                                        |
|---------|-----|-----|------|-----------------------------------------|------------------------|---------------|-------------------------|----------------------------------------------|-------------------------------------------------------------------------------------------------------------|
|         |     |     |      |                                         |                        |               |                         |                                              | acute respiratory failure, multiple organ dysfunction syndrome, acute kidney injury, pulmonary hypertension |

| Country | Age | Sex  | Race  | Score on WHO clinical scale at baseline | Clinical frailty scale | Treatment arm | Time on treatment, days | Time to death after start of treatment, days | AEs (preferred term)                                                                    |
|---------|-----|------|-------|-----------------------------------------|------------------------|---------------|-------------------------|----------------------------------------------|-----------------------------------------------------------------------------------------|
| USA     | 60  | Male | White | 6                                       | 3-Managing well        | BI 764198     | 4*                      | 23                                           | Acute myocardial infarction, COVID-19 pneumonia, respiratory failure, pneumomediastinum |

| Country | Age | Sex  | Race  | Score on WHO clinical scale at baseline | Clinical frailty scale | Treatment arm | Time on treatment, days | Time to death after start of treatment, days | AEs (preferred term)                                                                                             |
|---------|-----|------|-------|-----------------------------------------|------------------------|---------------|-------------------------|----------------------------------------------|------------------------------------------------------------------------------------------------------------------|
| USA     | 54  | Male | White | 6                                       | 1-Very fit             | BI 764198     | 6                       | 65                                           | Acute respiratory failure, COVID-19 pneumonia, septic shock, acute kidney injury, electrocardiogram QT prolonged |



| Country | Age | Sex  | Race  | Score on WHO clinical scale at baseline | Clinical frailty scale | Treatment arm | Time on treatment, days | Time to death after start of treatment, days | AEs (preferred term)                                                         |
|---------|-----|------|-------|-----------------------------------------|------------------------|---------------|-------------------------|----------------------------------------------|------------------------------------------------------------------------------|
| USA     | 67  | Male | White | 6                                       | 3-Managing well        | Placebo       | 10                      | 11                                           | Respiratory failure, septic shock, sepsis, acute kidney injury, pneumothorax |
| BR      | 56  | Male | White | 5                                       | 6-Moderately frail     | Placebo       | 8*                      | 30                                           | Respiratory failure                                                          |

| Country | Age | Sex    | Race                              | Score on WHO clinical scale at baseline | Clinical frailty scale | Treatment arm | Time on treatment, days | Time to death after start of treatment, days | AEs (preferred term)                                   |
|---------|-----|--------|-----------------------------------|-----------------------------------------|------------------------|---------------|-------------------------|----------------------------------------------|--------------------------------------------------------|
| MX      | 67  | Male   | American Indian or Alaskan Native | 6                                       | 2-Well                 | Placebo       | 5                       | 31                                           | Acute respiratory distress syndrome, pneumomediastinum |
| USA     | 62  | Female | Not given                         | 6                                       | 3-Managing well        | Placebo       | 7                       | 27                                           | COVID-19 pneumonia, respiratory failure,               |

| Country | Age | Sex  | Race  | Score on WHO clinical scale at baseline | Clinical frailty scale | Treatment arm | Time on treatment, days | Time to death after start of treatment, days | AEs (preferred term)                                                      |
|---------|-----|------|-------|-----------------------------------------|------------------------|---------------|-------------------------|----------------------------------------------|---------------------------------------------------------------------------|
|         |     |      |       |                                         |                        |               |                         |                                              | pulmonary hypertension, sepsis, acute kidney injury                       |
| USA     | 54  | Male | Asian | 6                                       | 2-Well                 | Placebo       | 13                      | 22                                           | Hypotension, bradycardia, right ventricular dilatation, right ventricular |

| Country | Age | Sex | Race | Score on WHO clinical scale at baseline | Clinical frailty scale | Treatment arm | Time on treatment, days | Time to death after start of treatment, days | AEs (preferred term)                                                                                                          |
|---------|-----|-----|------|-----------------------------------------|------------------------|---------------|-------------------------|----------------------------------------------|-------------------------------------------------------------------------------------------------------------------------------|
|         |     |     |      |                                         |                        |               |                         |                                              | dysfunction, respiratory failure, COVID-19 pneumonia, septic shock, acute respiratory failure, acute kidney injury, pulmonary |

| Country | Age | Sex | Race | Score on WHO clinical scale at baseline | Clinical frailty scale | Treatment arm | Time on treatment, days | Time to death after start of treatment, days | AEs (preferred term)                     |
|---------|-----|-----|------|-----------------------------------------|------------------------|---------------|-------------------------|----------------------------------------------|------------------------------------------|
|         |     |     |      |                                         |                        |               |                         |                                              | embolism, cardiac ventricular thrombosis |

BR, Brazil; CL, Chile; ES, Spain; MX, Mexico; USA, United States.

\*Treatment stopped on February 24, 2021 per trial treatment termination letter.

**Table 5. Treatment status of patients at the time notification of study discontinuation was implemented**

|                                                                         | <b>BI 764198</b><br><b>n=65</b> | <b>Placebo</b><br><b>n=64</b> | <b>Total</b><br><b>n=129</b> |
|-------------------------------------------------------------------------|---------------------------------|-------------------------------|------------------------------|
| Patients randomised but not treated*                                    | 3                               | 2                             | 5                            |
| Patients receiving active treatment*                                    | 8                               | 9                             | 17                           |
| Patients who had completed treatment or were off-treatment <sup>†</sup> | 54                              | 53                            | 107                          |

\*As of 22 February 2021. <sup>†</sup>Prior to 22 February 2021.

Figure S1. Sensitivity analyses of proportion of patients alive and free of mechanical ventilation at Day 29

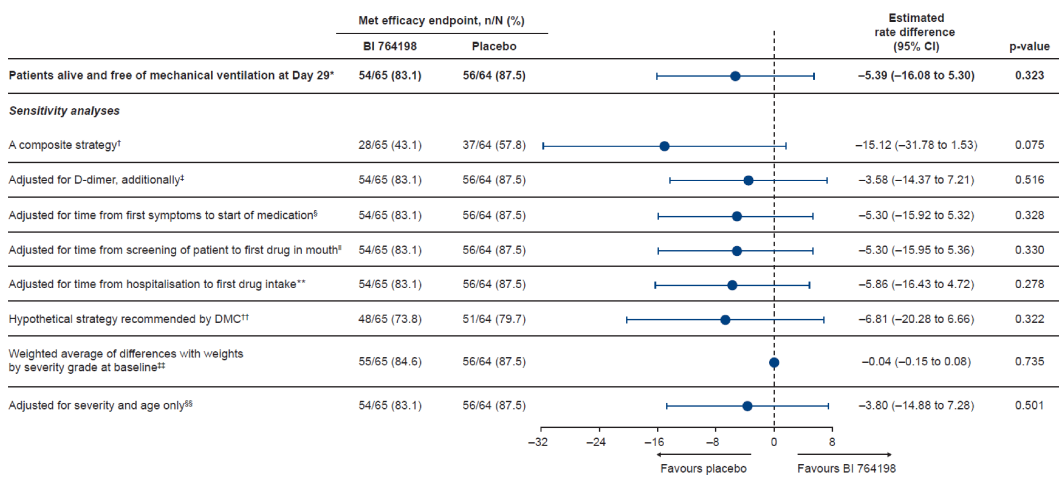

\*The logistic regression model includes treatment, severity grade at baseline, age, creatinine at baseline and duration of symptoms before hospitalization as covariates. †A composite strategy considers patients with treatment discontinuation, death and use of standard of care after initiation with BI 764198 as treatment failures. ‡The logistic regression model includes treatment, severity grade at baseline, age, creatinine at baseline, D-dimer at baseline and duration of symptoms before hospitalization as covariates. §The logistic regression model includes treatment, severity grade at baseline, age, creatinine at baseline and time from first symptoms to start medication as covariates. ¶The logistic regression model includes treatment, severity grade at baseline, age, creatinine at baseline and time from screening of patient to first drug in mouth as covariates. \*\*The logistic regression model includes treatment, severity grade at baseline, age, creatinine at baseline and time from hospitalization to first drug intake as covariates. ††Hypothetical estimate of treated patients who stopped treatment due to sponsor’s request as non-responders. ‡‡Severity grade at baseline is used for weights. §§The logistic regression model includes treatment,

severity grade at baseline and age.

CI, confidence interval; DMC, Data Monitoring Committee.



Figure S2. Subgroup analyses of proportion of patients alive and free of mechanical ventilation at Day 29

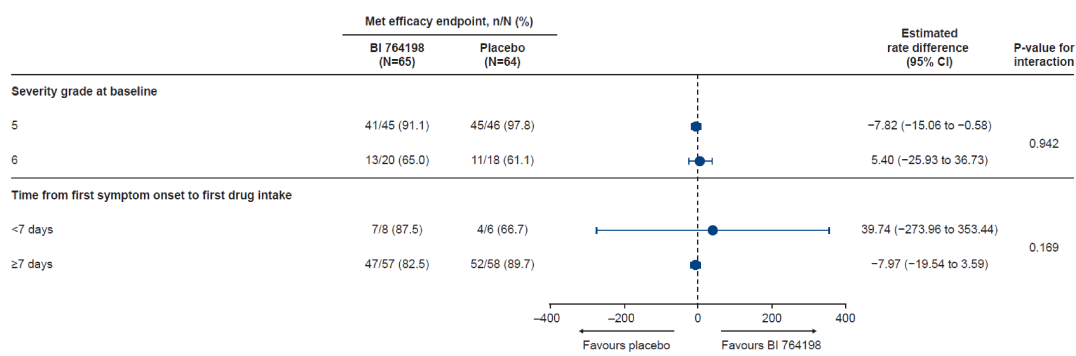

CI, confidence interval

Figure S3. Time to first response of clinical improvement or recovery\*

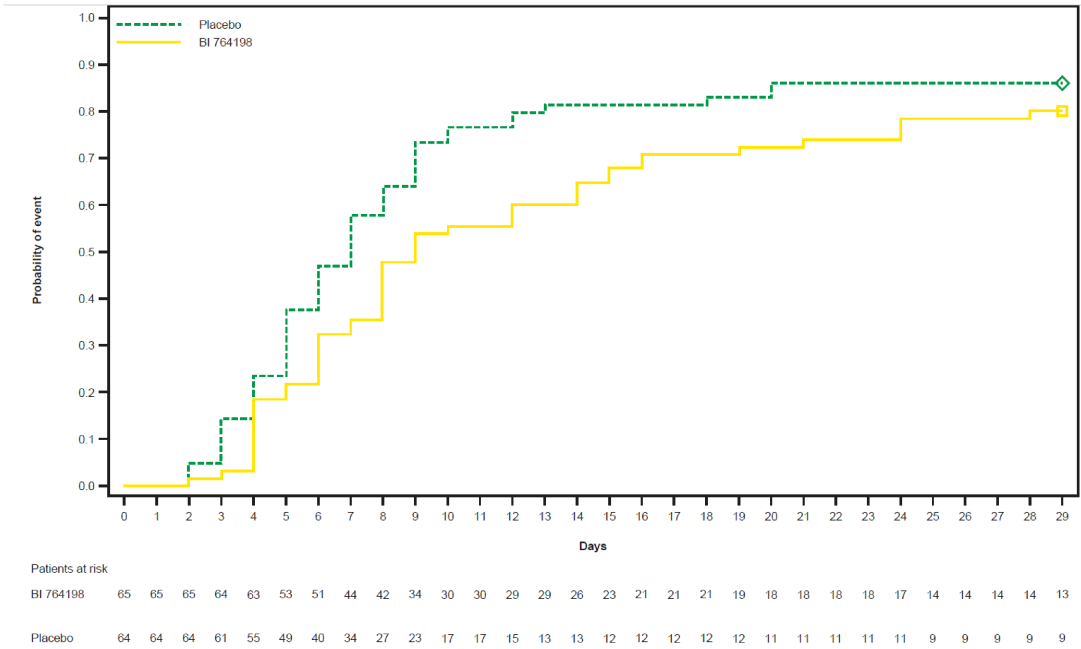

\*First response of clinical improvement or recovery defined as the first of any one of: a 2-point decrease in score (from randomization) on the WHO Clinical Progression Scale, discharge from the hospital, or considered fit for discharge (a score of 0, 1, 2, or 3 on the Clinical Progression Scale), whichever comes first, by Day 29.
